# Supplementary material for: Informal mhealth at scale in Africa: Opportunities and challenges
Source: PubMed Central journal article supplement (PMC7903241; doi:10.1016/j.worlddev.2020.105257), 2021-04
Supplement: mmc1.pdf [file mmc1.pdf]

**INFORMAL MHEALTH AT SCALE IN AFRICA: OPPORTUNITIES AND CHALLENGES**

**CONFLICTS OF INTEREST STATEMENT**

None of the authors has any conflicts of interest.

## **INFORMAL MHEALTH AT SCALE IN AFRICA: OPPORTUNITIES AND CHALLENGES**

### **AUTHOR CONTRIBUTIONS**

Kate Hampshire: conceptualisation, methodology, formal analysis, investigation, writing – original draft, supervision, project administration, funding acquisition

Alistair Munthali: methodology, writing – review & editing, supervision, project administration

Kassahun Alemu: methodology, investigation, writing – review & editing, supervision, project administration

Abane Albert: writing – review & editing, supervision, project administration

Elsbeth Robson: methodology, investigation, writing – review & editing

Simon Mariwah: methodology, investigation, writing – review & editing

Elita Chamdimba: methodology, investigation, writing – review & editing

Tawonga Mwase-Vuma: methodology, investigation, writing – review & editing

Tadesse Awoke: methodology, investigation, writing – review & editing

Samuel Asiedu Owusu: methodology, investigation, writing – review & editing

Michele Castelli: supervision, investigation, writing – review & editing

Ziv Shkedy: methodology, validation, writing – review & editing

Nicholas Shawa: software, supervision, writing – review & editing

Jane Abel: software, project administration, writing – review & editing

Adetayo Kasim: conceptualisation, supervision, methodology, writing – review & editing

**IMAGINE (Informal Mhealth in Africa: Grassroots Initiatives & Networks)**

**QUESTIONNAIRE FOR COMMUNITY HEALTH WORKERS [Ethiopia: Health Extension Workers]**

**Preamble**

(A) Questionnaire number [ ]

(B) Date: DD / MM / YY: \_\_\_\_\_/\_\_\_\_\_/\_\_\_\_\_

(C) Time: HH/MM: \_\_\_\_\_/\_\_\_\_\_

(D) Interviewer ID: [\_\_\_\_]

(E) Country: Ethiopia

(F) Region/State:

Amhara [ ]

Oromia [ ]

(G) Zone: \_\_\_\_\_

(H) District (or sub-city): \_\_\_\_\_

(I) Location: [urban / rural]

(J) Name of Health Post where the HEW is based: \_\_\_\_\_

(K) Name of Cluster Health Centre: \_\_\_\_\_

(L) Does the Health Post have a landline or wireless telephone? If so, is it currently working?

Yes – there is a landline/wireless phone which is currently working [ ]

Yes - There is a landline/wireless phone but it is not currently working [ ]

No – there is no landline/wireless phone [ ]

(M) Does the Cluster Health Centre have a landline or wireless telephone? If so, is it currently working?

Yes – there is a landline/wireless phone which is currently working [ ]

Yes - There is a landline/wireless phone but it is not currently working [ ]

No – there is no landline/wireless phone [ ]

**Go through introduction with informed consent procedure [separate document]**

**Section A: Background information on respondent**

1  
2  
3  
4  
5  
6  
7  
8  
9  
10  
11  
12  
13  
14  
15  
16  
17  
18  
19  
20  
21  
22  
23  
24  
25  
26  
27  
28  
29  
30  
31  
32  
33  
34  
35  
36  
37  
38  
39  
40  
41  
42  
43  
44  
45  
46  
47  
48  
49  
50  
51  
52  
53  
54  
55  
56  
57  
58  
59  
60  
61  
62  
63  
64  
65

1. Gender [F / M]      *[Tick one]*
2. Age [in completed years] \_\_\_\_\_
3. Job title: *[Tick one]*  
    Health Extension Worker      [ ]
4. How much do you earn each month as an HEW...
  - (a) Monthly salary (average)      \_\_\_\_\_ Birr
  - (b) Additional allowances, etc. (average)      \_\_\_\_\_ Birr
5. How far is your Health Post from the Cluster Health Centre?
  - (a) In kilometres:      \_\_\_\_\_ km
  - (b) In time to walk there:      \_\_\_\_\_ hours [include fractions of an hour]
6. How far is your Health Post from the furthest part of your catchment area?
  - (a) In kilometres:      \_\_\_\_\_ km
  - (b) In time to walk there:      \_\_\_\_\_ hours [include fractions of an hour]
7. Do you live within your catchment area? *[Tick one]*
  - Yes, all of the time      [ ]
  - Yes, some of the time      [ ]
  - No      [ ]
8. Do you currently have any transport provided by your workplace to move around? *[Tick all that apply]*
  - Yes – bicycle      [ ]
  - Yes – motorbike      [ ]
  - Yes – taxi/bajaj fares      [ ]
  - Yes – other      [ ] → please state \_\_\_\_\_
  - No – none      [ ]
9. Duration of employment as a HEW: [\_\_\_\_\_] months / years
10. What is your level of training and qualification?
  - (a) HEW training level: 1 / 2 / 3 / 4 *[Circle one]*
  - (b) Additional nursing or midwifery qualifications: *[Tick all that apply]*
    - Nursing Diploma      [ ]
    - Nursing Degree (BSc)      [ ]
    - Midwifery Diploma      [ ]
    - Midwifery Degree (BSc)      [ ]
    - Other      [ ] → specify \_\_\_\_\_
    - None      [ ]

**Section B: Phone (and tablet) ownership and use**

11. Have you ever received a mobile phone or tablet from your work (Ministry, donors, etc.)? Do you currently have one? Is it working? *[Tick one]*

I currently have a mobile phone or tablet from my work that is in working order [ ] → Q 12 then 14

I have a mobile phone/tablet from my work but it is not currently working [ ] → skip to Q 13

I don't currently have a mobile phone/tablet from my work but I have in the past [ ] → skip to Q 13

I have never had a mobile phone/tablet provided by my work [ ] → skip to Q 14

12. *If you currently have a functioning mobile phone/device provided by your work, ANSWER ALL THESE*

**QUESTIONS:**

(a) How many mobile phones provided by your work are you currently using? [ ]

(b) How many tablets provided by your work are you currently using? [ ]

(c) In which year did you receive your [first] mobile device from your workplace? [20\_\_]

(d) Is any of these devices provided by your work internet-enabled (*can use WhatsApp, Facebook, etc.*)? [Y/N]

13. *If you do not currently have a working mobile device provided by your work, but have had in the past,*

**ANSWER ALL THESE QUESTIONS:**

(a) In which year did you get your [first] mobile device from your work? [20\_\_]

(b) What happened to this mobile device(s)? *[Tick all that apply]*

Got damaged [ ]

Got lost [ ]

Got stolen [ ]

Given away [ ]

Other [ ] → specify \_\_\_\_\_

(c) For how long have you been without a mobile device from workplace)? [\_\_\_\_] wks / mths / yrs

14. Do you currently own a personal mobile phone/device (not provided by your work)? Is it in working order? Have you ever owned one? *[Tick one]*

I currently have a personal mobile phone/device in working order [ ] → Q 15 then 17

I have a mobile phone/device but it is not currently working [ ] → skip to Q 16

I do not currently have a personal mobile phone/device but have in the past [ ] → skip to Q 16

I have never owned a personal mobile phone/device [ ] → skip to Q 17

15. *If you currently have a personal mobile phone/device in working order, ANSWER ALL THESE QUESTIONS:*

(a) How many personal mobile phones do you currently own? [ ]

(b) How many personal tablets do you currently own? [ ]

(c) Is any of your personal phones/devices internet-enabled (*can use WhatsApp, Facebook, etc*)? [Y/N]

(d) **Do you currently use your personal phone/device for any aspect of your work as a HEW?** [Y/N]  
*[Prompt: any aspect includes contacting patients, clients, volunteers, colleagues, etc.]*

16. If you no longer have a personal mobile phone/device in working order but have done in the past,

**ANSWER ALL THESE QUESTIONS:**

(a) What happened to your phone(s)/device(s)? [Tick all that apply]

Got broken [ ]

Got lost [ ]

Got stolen [ ]

Given away [ ]

Other [ ] → specify \_\_\_\_\_

(b) For how long have you been without a mobile phone/device? [\_\_\_\_\_] weeks / months / years

(c) Have you ever used a personal phone/device in your work as an HEW? [Y/N]

17. Have you ever received any of the following equipment by your work to facilitate your use of a mobile phone or tablet? [Tick all that apply and indicate which ones are still working.]

(a) Solar charger [Y/N] → still working? [Yes/No/NA]

(b) Power bank [Y/N] → still working? [Yes/No/NA]

(c) Other equipment [Y/N] → specify \_\_\_\_\_ → still working? [Yes/No/NA]

**\*\*Major filter questions: probe carefully to ensure they are answered correctly\*\***

18. **CHECK:** Does the respondent currently use a mobile phone or device of any kind in their work as a HEW?

[Prompt to include contacting patients, colleagues, etc., using WhatsApp groups, etc.]

Yes [ ] → Sections C, D and F (omit Section E)

No [ ] → Q 19

19. **CHECK:** Have the respondent ever used a mobile phone or device of any kind in their work as a HEW?

[Prompt as above and tick one]

Yes – within the last 4 weeks [ ] → Sections C, D and F (omit Section E)

Yes – within the last 12 months [ ] → Sections D, E and F (omit section C)

Yes – but longer than 12 months ago [ ] → Sections E and F (omit Sections C & D)

No – never [ ] → Sections E and F (omit Sections C & D)

**Section C: Use of mobile devices (phone/tablet) in community healthcare**

*This section is only for respondents who are currently using any mobile device for work-related purposes, or who have done so in the last 4 weeks.*

20. **CHECK:** How many mobile devices is the respondent currently using for work-related purposes? [ \_\_\_\_ ]

21. **CHECK:** Which is the main mobile device used for work-related purposes? [*Tick one*]

Mobile phone provided by work [ ]

Tablet provided by work [ ]

Your own, personal mobile phone [ ]

Your own, personal tablet [ ]

Another device (colleague's, friend's...) [ ]

**\*\*From this point, if the respondent does not have/use a tablet, for the rest of the questionnaire refer to 'mobile phone' instead of 'mobile device'.**

22. **CHECK:** Is the phone/device used for work internet-enabled? [Y/N]

[*If the respondent is not sure, ask to see the phone or ask if it uses data bundles or can do WhatsApp, Facebook, etc.*]

23. **ASK:** How often do you currently use a mobile phone/device in your work as an HEW? [*tick one*]

Every day / most days [ ]

At least once a week [ ]

At least once a month [ ]

Rarely or never [ ]

**Section C(i): 'Official' Apps and Functions**

24. Has your work ever provided dedicated Apps/functions/tools for you use as a HEW? If so, are you still using any of them?

Yes, and still using some/all of them [ ] → Q 25

Yes, but not currently using any of them [ ] → skip to Q 33

No – I have never had these [ ] → skip to Q 33

25. Which of these Apps/functions/tools provided by work are you currently using?

[*Tick each one that has been used within the last 4 weeks*]

Tools for managing/reporting child health & vaccinations [ ]

Tools for managing/reporting maternal and new-born health [ ]

Tools for managing/reporting Family Planning [ ]

Tools for managing/reporting infectious disease outbreaks [ ]

Tools for managing medicine supply [ ]

Tools for collecting other data [ ]

Tools for sending / uploading reports [ ]

Toll-free calls/messages (e.g. to call centre) [ ]

Any other tools/apps/functions → specify \_\_\_\_\_ [ ]

26. Do any of these Apps/tools require data on your mobile phone/device to work? [Tick one]

Yes [ ] → proceed to Q 27

No [ ] → skip to Q 29

27. Does your work cover the cost of data to use these? [Tick one]

My workplace covers all the data costs of using these functions [ ] → skip to Q 29

My workplace provides a data allowance – I have to pay if I exceed this [ ] → proceed to Q 28

I have to pay for all the data required [ ] → skip to Q 29

28. What data allowance do you get per month? [\_\_\_\_\_] MB

→ (a) Do you usually exceed this amount? [Y/N]

29. Do any of these Apps/tools that you use require balance (airtime) on your phone/device? [Tick one]

Yes [ ] → proceed to Q 30

No [ ] → skip to Q 32

30. Does your work cover the cost of airtime (balance) to use these? [Tick one]

My workplace covers all the airtime costs of using these functions [ ] → Q 32

My workplace provides an airtime allowance – I have to pay if I exceed this [ ] → Q 31

I have to pay for all the airtime required [ ] → Q 32

31. What airtime (balance) allowance do you get per month? [\_\_\_\_\_] Birr

→ (a) Do you usually exceed this amount? [Y/N]

32. Only for respondents using a mobile phone/device provided by their work (otherwise tick N/A):

Is your phone/device restricted for these functions only, or it be used for other purposes? [Tick one]

Restricted for these specific functions only [ ]

Available for other work-related purposes *but not* personal use [ ]

Available for other work-related purposes *and* personal use [ ]

N/A – Not using a device provided by work [ ]



**Section C(ii): “Unofficial” phone use for health extension work**

1 **33.** Which of the following functions do you use on your phone/device for work related purposes?  
2 [Tick all that you have used within the last 4 weeks for work-related purposes. Do not include any  
3 Apps/functions provided by your work]  
4

- 5
- 6 a) Voice calls [making or receiving] [ ]
- 7 b) SMS (to communicate with patients, fellow HEWs, HDAs, supervisor, etc.) [ ]
- 8 c) SMS to send reports, data or information [ ]
- 9 d) WhatsApp, Viva, Imo (or similar) to send reports, data or information [ ]
- 10 e) WhatsApp, Viva, Imo (or similar) to contact someone (e.g. patient, colleague) [ ]
- 11 f) Participating in a WhatsApp (or Imo/Viva) Group (e.g. of fellow HEWs) [ ]
- 12 g) Establishing a WhatsApp (or Imo/Viva) Group (e.g. of fellow HEWs) [ ]
- 13 h) Facebook or other networking site to seek information [ ]
- 14 i) Google (or other internet search) to get information [ ]
- 15 j) Downloaded health-related Apps (e.g. from Google Playstore) [ ]
- 16 k) Notepad (or similar) for making notes [ ]
- 17 l) Camera/video: Taking pictures or film of activities, events, etc. [ ]
- 18 m) Camera: Taking shots of reports / paperwork [ ]
- 19 n) Camera: Taking pictures of patient symptoms (to seek advice) [ ]
- 20 o) Voice recording (e.g. for recording meetings or any other purpose) [ ]
- 21 p) Calculator: for collecting data or making reports [ ]
- 22 q) Calculator: calculating medicine dosages [ ]
- 23 r) Torch to work in the night [ ]
- 24 s) Torch for patient examination [ ]
- 25 t) Clock or stopwatch/timer (e.g. for taking pulse or breathing rate) [ ]
- 26 u) Mobile money or banking (e.g. to collect/send payments or allowances) [ ]
- 27 v) Other → specify \_\_\_\_\_ [ ]
- 28
- 29
- 30
- 31
- 32
- 33
- 34
- 35
- 36
- 37
- 38

39 **Section C(iii): Mobile phone/device communication in community health work**

40 For the questions in this section, include any form of phone-based communication: calls, SMS, Whatsapp, etc.

41 **34. Do you communicate with patients/clients using a mobile phone/device? [Tick one]**

42 [Include any communication including calls, SMS, Whatsapp, etc.]

- 43 Yes [ ] → proceed with Q 35
- 44 No [ ] → skip to Q 41

45 **35. How often on average do you contact patients/clients using your mobile phone/device? [Tick one box.]**

- 46 Every day / most days [ ]
- 47 At least once a week [ ]
- 48 At least once a month [ ]
- 49 Rarely or never [ ]
- 50
- 51
- 52
- 53
- 54
- 55
- 56
- 57
- 58
- 59
- 60
- 61
- 62
- 63
- 64
- 65

36. For what purposes do you contact patients/clients by mobile phone/device? [List and tick all that apply within the last 4 weeks]

- To arrange visits / appointments [ ]
- To check up on them (e.g. medication adherence) [ ]
- To report test results (e.g. malaria, TB, HIV, etc.) [ ]
- To respond to a call-me-back or missed call [ ]
- Social call / greetings [ ]
- Other reasons → specify \_\_\_\_\_ [ ]
- None [ ]

37. How often on average do patients/clients contact you on your mobile phone/device? [Tick one]

- Every day / most days [ ]
- At least once a week [ ]
- At least once a month [ ]
- Rarely or never [ ]

38. For what purposes do patients/clients contact you on your mobile phone/device? [List and tick all that apply within the last 4 weeks]

- To request or arrange visits / appointments [ ]
- To ask for advice [ ]
- To request help/transport in an emergency (including childbirth)[ ]
- Because they have run out of medication [ ]
- Social call / greetings [ ]
- Other reasons → specify \_\_\_\_\_ [ ]
- None [ ]

39. Approximately how many clients'/patients' contacts do you have on your mobile phone/device? [\_\_\_]

40. Approximately how many clients/patients do you think have your personal contact? [\_\_\_]

41. **Do you communicate with HDAs or other community leaders/volunteers using a mobile phone/device? [Tick one]**

- Yes [ ] → proceed with Q 42
- No [ ] → skip to Q 48

42. How often on average do you contact HDAs, etc. using your mobile phone/device? [Tick one]

- Every day / most days [ ]
- At least once a week [ ]
- At least once a month [ ]
- Rarely or never [ ]

43. For what purposes do you contact HDAs, etc. by mobile phone/device? [List and tick all that apply within the last 4 weeks]

- 1 Arranging / cancelling / confirming visits, meetings or other activities [ ]
- 2 Following up on specific patients or clients [ ]
- 3 Responding to a call-me-back or missed call from a volunteer [ ]
- 4 Organising an emergency response [ ]
- 5 Social call / greetings [ ]
- 6 Other reasons → specify \_\_\_\_\_ [ ]
- 7 None [ ]

44. How often on average do HDAs, etc. contact you on your mobile phone/device? [Tick one]

- 14 Every day / most days [ ]
- 15 At least once a week [ ]
- 16 At least once a month [ ]
- 18 Rarely or never [ ]

45. For what purposes do HDAs, etc. contact you on your mobile phone/device? [List and tick all that apply within the last 4 weeks]

- 23 To arrange / cancel / confirm visits, meetings or other activities [ ]
- 24 To give feedback / update on a patient/client [ ]
- 25 To give feedback on an activity or event [ ]
- 26 To request advice [ ]
- 27 For help/transport in an emergency (including childbirth) [ ]
- 28 Social call / greetings [ ]
- 29 Other reasons → specify \_\_\_\_\_ [ ]
- 30 None [ ]

46. Approximately how many HDA/volunteers' contacts do you have on your mobile phone/device? [\_\_\_]

47. Approximately how many HDA/volunteers do you think have your personal contact? [\_\_\_]

48. Do you communicate with your supervisor/boss using a mobile phone/device? [Tick one]

- 42 Yes [ ] → proceed with Q 49
- 43 No [ ] → skip to Q 53

49. How often on average do you contact your supervisor/boss using a mobile phone/device? [Tick one]

- 48 Every day / most days [ ]
- 49 At least once a week [ ]
- 50 At least once a month [ ]
- 52 Rarely or never [ ]

50. For what purposes do you contact your supervisor(s)/boss by mobile phone/device? [List and tick all that apply within the last 4 weeks]

- 1 To ask for advice or assistance [ ]
- 2 To get help or transport in an emergency [ ]
- 3 To manage supplies of medicines/equipment [ ]
- 4 To send reports / data [ ]
- 5 To send information on specific patients/clients [ ]
- 6 To arrange meetings [ ]
- 7 To report your absence from work [ ]
- 8 To respond to a call-me-back or missed call [ ]
- 9 Social call / greetings [ ]
- 10 Other → specify \_\_\_\_\_ [ ]
- 11 None [ ]

51. How often on average does your supervisor(s)/boss contact you on your mobile phone/device? [Tick one]

- 12 Every day / most days [ ]
- 13 At least once a week [ ]
- 14 At least once a month [ ]
- 15 Rarely or never [ ]

52. For what purposes does your supervisor(s)/boss contact you on your mobile phone/device? [List and tick all that apply within the last 4 weeks]

- 16 To give instructions / orders [ ]
- 17 To request reports or data [ ]
- 18 To request feedback on a patient/client [ ]
- 19 To request other information [ ]
- 20 To give you information / feedback [ ]
- 21 To arrange meetings [ ]
- 22 For supervision [ ]
- 23 To give feedback on your performance [ ]
- 24 Social call / greetings [ ]
- 25 Other → specify \_\_\_\_\_ [ ]
- 26 None [ ]

53. Do you communicate with your fellow HEWs (or other health-workers) using a mobile phone/device?

[Include peers, junior colleagues and senior colleagues, but not your supervisor/ boss. Tick one.]

- 27 Yes [ ] → proceed with Q 54
- 28 No [ ] → skip to Q 57

54. How often on average do you contact your fellow HEWs/health-workers using a mobile phone/device?

[Tick one]

- 29 Every day / most days [ ]
- 30 At least once a week [ ]
- 31 At least once a month [ ]
- 32 Rarely or never [ ]

55. How often on average do **your fellow HEWs/health-workers** contact you on your mobile phone/device?

[Tick one]

- 1 Every day / most days [ ]
- 2 At least once a week [ ]
- 3 At least once a month [ ]
- 4 Rarely or never [ ]

56. For what purposes are you in contact your fellow HEWs/health-workers by mobile phone/device?

[Includes contacts in both directions. List and tick all that apply within the last 4 weeks]

- 11 To request/provide advice or assistance [ ]
- 12 To request/provide help in an emergency [ ]
- 13 To manage supplies of medicines/equipment [ ]
- 14 To arrange meetings [ ]
- 15 To request/provide information on meetings, training, etc. [ ]
- 16 To request/give feedback or information on particular patients/clients [ ]
- 17 For supervision [ ]
- 18 To respond to a call-me-back or missed call [ ]
- 19 Social call / greetings [ ]
- 20 Other → specify \_\_\_\_\_ [ ]
- 21 None [ ]

57. Have you ever used your phone/device to call emergency transport (e.g. ambulance, taxi, bajaj, etc.) for a health emergency (including childbirth) If so, when? [Tick one]

- 30 Yes – within the last four weeks [ ]
- 31 Yes, but longer than 4 weeks ago [ ]
- 32 No, never [ ]

58. How often on average do you receive ‘call-me-backs’ or missed calls in your HEW capacity? [Tick one]

- 37 Every day / most days [ ] → proceed to Q 59
- 38 At least once a week [ ] → proceed to Q 59
- 39 At least once a month [ ] → proceed to Q 59
- 40 Rarely or never [ ] → Skip to Q 62

59. Who sends ‘call-me-backs’ (or missed calls) in your HEW capacity? [Tick all that apply]

- 45 Patients / clients [ ]
- 46 HDA/volunteers [ ]
- 47 Your supervisor/boss [ ]
- 48 Other HEWs/health-workers [ ]

60. Of these, who sends ‘call-me-backs’ or missed calls you most often? [Tick one]

- 53 Patients / clients [ ]
- 54 HDA/volunteers [ ]
- 55 Your supervisor/boss [ ]
- 56 Other HEWs/health-workers [ ]

61. How often are you able to respond quickly to these call-me-backs or missed calls? [Tick one]

- 1 Always or almost always [ ]  
2 Most of the time, if I have balance [ ]  
3 Sometimes, if I have balance [ ]  
4 Rarely or never [ ]  
5

62. Do you ever receive work-related calls (from patients, HDAs, colleagues, etc.) outside normal working hours? If so, how often? [Tick one]

- 9 Every day / most days [ ] → proceed to Q 63  
10 At least once a week [ ] → proceed to Q 63  
11 At least once a month [ ] → proceed to Q 63  
12 Rarely or never [ ] → Skip to Q 65  
13  
14  
15

63. Do you ever receive work-related calls in the night? If so, how often? [Tick one]

- 16 Every day / most days [ ] → proceed to Q 64  
17 At least once a week [ ] → proceed to Q 64  
18 At least once a month [ ] → proceed to Q 64  
19 Rarely or never [ ] → Skip to Q 65  
20  
21  
22  
23

64. Who contacts you outside of working hours or in the night (for work purposes)? [Tick all that apply]

- 24 Patients / clients [ ]  
25 HDA/volunteers [ ]  
26 Your supervisor/boss [ ]  
27 Other HEWs/health-workers [ ]  
28  
29  
30  
31

65. Who is most likely to call you outside of working hours or in the night? [Tick one]

- 32 Patients / clients [ ]  
33 HDA/volunteers [ ]  
34 Your supervisor/boss [ ]  
35 Other HEWs/health-workers [ ]  
36  
37  
38  
39  
40  
41  
42

### 43 Section C(iv): Time, costs, data, privacy

44 66. On an average working day, can you estimate how much time you spend on a mobile phone/device for  
45 work-related purposes? \_\_\_\_ h \_\_\_\_ m  
46  
47

48 67. In an average week, can you estimate how much money you spend on airtime (balance) for work-related  
49 purposes? \_\_\_\_\_ Birr  
50  
51

52 68. In an average week, can you estimate how much money you spend on data (bundles) for work-related  
53 purposes? \_\_\_\_\_ Birr  
54  
55

56 69. Do you receive any compensation / allowance to cover these costs (airtime and data bundles)? [Y/N]

57 → If yes:

- 58 (a) How much airtime (balance) did you receive for the last month? \_\_\_\_\_ Birr  
59 (b) How much data did you receive for the last month? \_\_\_\_\_ MB  
60  
61  
62

70. On average, do you spend more money on work-related phone use or personal phone use? [Tick one]

I spend more money for work use than personal use [ ]

I spend about the same amount for work use and personal use [ ]

I spend more money for personal use than work use [ ]

71. Does anyone else sometimes use your phones/devices (the ones you use for work)? [Tick all that apply]

Yes – fellow health-workers [ ]

Yes – friends, family, etc. [ ]

No [ ]

72. Do you currently have any confidential patient data or images stored on your phone(s)/device(s)?

[Tick all that apply]

Yes – I have images of patients [e.g. symptoms] [ ] → continue to Q 73

Yes – I have other patient data [ ] → continue to Q 73

No – no patient images/data currently on phone [ ] → skip to Q 74

73. If you currently have confidential patient data/images on your mobile phone/device, are these stored securely (password, log-in, etc.)? [Tick one only]

Yes – all of them are stored securely [ ]

No – some or all are not all stored securely [ ]

74. Have you ever received any training on the use of mobile phones/devices in your work? If so, what training? [Tick all that apply]

Yes – training on using a phone/device provided by workplace [ ]

Yes – training on using specific apps/tools [ ]

Yes – training on using a personal mobile phone/device for work purposes [ ]

Yes – any other training on mobile phone/device use [ ]

No – no such training received [ ]

75. Does your workplace have any policies, agreements or codes of practice regarding mobile phone/device use? If so, which ones? [Tick all that apply]

Policies restricting use of phones/devices during work-time [ ]

Policies about use of personal phones/devices for work-related purposes [ ]

Policies about storing patient data securely on a phone/device [ ]

Policies regarding reimbursement for work-related phone/device use [ ]

Agreements on appropriate use of work-provided mobile phone/device [ ]

Agreements regarding loss, theft or damage to work-provided phone/device [ ]

Other → specify \_\_\_\_\_ [ ]

No – no policies, agreements or codes of practice [ ]

Don't know [ ]

**Section D: Evaluations of the experience of using mobile phones/devices for work-related purposes**

**Section only for those who have used a mobile device for work-related purposes within the last 12 months**

76. Please indicate which of the following benefits you have experienced personally using a mobile phone/device for work-related purposes, and how important these have been.

| Possible benefit                                                    | Tick one box per question |               |               |
|---------------------------------------------------------------------|---------------------------|---------------|---------------|
|                                                                     | Not identified            | Small benefit | Major benefit |
| a. Reduction of workload                                            |                           |               |               |
| b. Making work more efficient                                       |                           |               |               |
| c. Completing work faster                                           |                           |               |               |
| d. Less need to travel                                              |                           |               |               |
| e. Better communication with patients/clients                       |                           |               |               |
| f. Better communication with HDAs / other volunteers                |                           |               |               |
| g. Better communication with fellow health-workers or supervisor    |                           |               |               |
| h. Making work more enjoyable                                       |                           |               |               |
| i. Making work less stressful                                       |                           |               |               |
| j. Easier to follow up on patients                                  |                           |               |               |
| k. Reduces risk of patients defaulting on medication (e.g. HIV, TB) |                           |               |               |
| l. Improves patient health outcomes                                 |                           |               |               |
| m. Improves patient confidentiality                                 |                           |               |               |
| n. Improves medicine supply                                         |                           |               |               |
| o. Timely submission of data / reports                              |                           |               |               |
| p. Easier to arrange meetings / other work logistics                |                           |               |               |
| q. Other → specify:                                                 |                           |               |               |

77. Has using a mobile phone/device ever saved a patient's life? [Y/N/don't know]

78. Please indicate which of the following difficulties/challenges **you have experienced personally** when using a personal mobile phone/device for work-related purposes, and how serious they are.

| Possible difficulty/challenge                             | Tick one box per question |                 |                 |
|-----------------------------------------------------------|---------------------------|-----------------|-----------------|
|                                                           | Not identified or N/A     | Minor challenge | Major challenge |
| a. Problems with phone network                            |                           |                 |                 |
| b. Problems getting internet                              |                           |                 |                 |
| c. Cost of airtime/balance                                |                           |                 |                 |
| d. Cost of data (bundles)                                 |                           |                 |                 |
| e. Battery charge problems                                |                           |                 |                 |
| f. Damage to phone/device                                 |                           |                 |                 |
| g. Theft or loss of phone/device                          |                           |                 |                 |
| h. Others (patients/clients/HDA) <b>not</b> having phones |                           |                 |                 |
| i. Phone disturbing regular work                          |                           |                 |                 |
| j. Too many calls out of work time                        |                           |                 |                 |
| k. Too many calls in the night                            |                           |                 |                 |
| l. Unwanted/irrelevant calls                              |                           |                 |                 |
| m. Negative impacts on marital or social relationships    |                           |                 |                 |
| n. Risk to patient privacy/confidentiality                |                           |                 |                 |
| o. Increased workload                                     |                           |                 |                 |
| p. Makes work more stressful                              |                           |                 |                 |
| q. Other → specify                                        |                           |                 |                 |



79. Have mobile phones/devices increased or decreased face-to-face meetings with patients/clients? [Tick one only]

- 1 Increased face-to-face meetings with patients/clients [ ]  
2  
3 Decreased face-to-face meetings with patients/clients [ ]  
4  
5 No change [ ]  
6

80. Have mobile phones/devices increased or decreased face-to-face meetings with your fellow health-workers and supervisors/boss? [Tick one only]

- 9 Increased face-to-face meetings with HEWs, boss, etc. [ ]  
10  
11 Decreased face-to-face meetings with HEWs, boss, etc. [ ]  
12  
13 No change [ ]  
14

81. Have you ever been unable to use your mobile phone/device for work when you wanted or needed to? [Y/N] → If no, skip to Q 82.

18  
19 → If yes ASK ALL THESE QUESTIONS:

20 (a) For what reasons has this happened? [Tick all that apply within the last twelve months]

- 21 Battery out of charge [ ]  
22  
23 No phone signal/network [ ]  
24  
25 No balance (airtime) [ ]  
26  
27 Phone not working properly [ ]  
28  
29 Other: specify \_\_\_\_\_ [ ]

30 (b) For how long were you unable to use a phone/device for your work? [Tick all that apply]

- 31 Short-term (a few hours or the occasional day) [ ]  
32  
33 Medium-term (several days at a time) [ ]  
34  
35 Longer-term (several weeks or months) [ ]  
36

37 (c) Has this had any significant consequences on your work? If so, what? [Tick all that apply]

- 38 No significant consequences [ ]  
39  
40 Negative impact on patient health [ ]  
41  
42 Wasted time (e.g. travelling unnecessarily) [ ]  
43  
44 Missed meeting or training opportunity [ ]  
45  
46 Disappointed clients/patients/HDAs by missing an appointment/meeting [ ]  
47  
48 Disappointed fellow-health workers or supervisor by missing a meeting [ ]  
49  
50 Other → specify \_\_\_\_\_ [ ]

51 (d) To your knowledge, has your inability to use a mobile phone/device when needed ever resulted directly in a patient's death? [Tick one]

- 52 Yes [ ]  
53  
54 No [ ]  
55  
56 Don't know [ ]  
57  
58  
59  
60  
61  
62  
63  
64  
65

82. In the last four weeks, have you had to make any sacrifices (financial or other) in order to use a mobile phone/device for work-related purposes? [Y/N]

→ If yes, what? [tick all that apply]

- Food or other essentials [ ]
- Non-essentials [ ]
- Savings [ ]
- Other \_\_\_\_\_ [ ]

83. How easy/difficult would it be for someone to do your job without using a mobile phone/device?

[Tick one]

- Easy [ ]
- Quite difficult [ ]
- Very difficult [ ]
- Impossible [ ]

84. For those using internet: How easy/difficult would it be for someone to do your job without the internet on your phone/device? [tick one]

- Easy [ ]
- Quite difficult [ ]
- Very difficult [ ]
- Impossible [ ]
- N/A (don't use internet) [ ]

85. For those without (or not using) internet: Does not having/using the internet make any aspects of your work more difficult?

- Yes [ ]
- No [ ]
- N/A (internet user) [ ]

(a) → If yes, which aspects are more difficult? [Tick all that apply]

- Keeping in touch with patients/clients or following up on them [ ]
- Keeping in touch with fellow health-workers and/or supervisor [ ]
- Responding in emergencies [ ]
- Being aware of current disease outbreaks /other important information [ ]
- Arranging meetings [ ]
- Being aware of meetings and training opportunities [ ]
- Collecting data [ ]
- Compiling and/or sending reports [ ]
- Other: specify → \_\_\_\_\_ [ ]

**Section E: Non-use of a mobile phone for work.**

*This section is only for those who do not use mobile phone/device for work (and who have not done so within the last four weeks).*

86. Check: Have you ever used a mobile phone/device in your work as a HEW?

Yes [ ] → proceed to Q 87

No [ ] → skip to Q 89

87. How long ago did you stop using a mobile phone/device in your work? \_\_\_\_\_ months / years

88. Why did you stop using a mobile phone/device for your work? [Tick all that apply.]

Phone got damaged [ ]

Phone got lost [ ]

Phone got stolen [ ]

Too expensive [ ]

Network problems [ ]

Other reason [ ] → please state \_\_\_\_\_

89. Does not using a mobile phone/device make any aspects of your work more difficult?

Yes [ ] →

No [ ]

(a) → if yes, which aspects are more difficult? [Tick all that apply]

Keeping in touch with patients/clients and following up on them [ ]

Keeping in touch with fellow health-workers and/or supervisor [ ]

Responding in emergencies [ ]

Being aware of current disease outbreaks /other important information [ ]

Arranging meetings [ ]

Being aware of meetings and training opportunities [ ]

Collecting data [ ]

Compiling and/or sending reports [ ]

Other: specify → \_\_\_\_\_ [ ]

90. To your knowledge, has not having a phone ever led to a patient's health deteriorating? [Tick one]

Yes [ ]

No [ ]

Don't know [ ]

91. To your knowledge, has not having a phone ever led to a patient's death? [Tick one]

Yes [ ]

No [ ]

Don't know [ ]

92. Are there any advantages to not using a mobile phone for your work? [Tick all that apply]
- Yes – patients or HDAs are not disturbing me with their calls/requests [ ]
  - Yes – supervisor/boss or fellow HEWs are not disturbing me with their calls/requests [ ]
  - Yes – I don't have to use my money on airtime / data for work [ ]
  - Yes – I don't have to worry about charging, network, etc. [ ]
  - Yes – other: → specify \_\_\_\_\_ [ ]
  - No – no advantages [ ]

93. Have you come under any pressure to get/use a mobile phone for your work? [Y/N]

(a) → If yes, from whom? [Tick all that apply]

- From patients/clients/HDAs [ ]
- From fellow health-workers [ ]
- From manager/supervisor/boss [ ]
- Other: specify \_\_\_\_\_ [ ]

**Section F: Ways forward**

***This section is for EVERYONE.***

94. Which of the following initiatives would help you to use a mobile phone (or other device) more effectively in your work as a HEW? Add your own if you have other ideas

***\*\*Make it clear that we are not in a position to provide any of these\*\****

| <b>Initiative</b>                                                 | <i>Tick if this would be beneficial to you</i> |
|-------------------------------------------------------------------|------------------------------------------------|
| a. Provide a mobile phone for work use                            |                                                |
| b. Upgrade my basic phone to an internet-enabled or smart phone   |                                                |
| c. Provide dedicated SIM card for work use                        |                                                |
| d. Provide free calls and SMS                                     |                                                |
| e. Provide a monthly airtime allowance                            |                                                |
| f. Provide a monthly data bundle phone allowance                  |                                                |
| g. Provide a good-quality solar phone charger                     |                                                |
| h. Provide a good-quality power bank                              |                                                |
| i. Provide training on using phones for work                      |                                                |
| j. Provide a dedicated helpline for advice / emergency assistance |                                                |
| k. Other → specify                                                |                                                |
| l. Other → specify                                                |                                                |
| m. Other → specify                                                |                                                |

95. Which **three** of these initiatives would be the **most beneficial**? In order of importance:  
[State the letter in each case. If fewer than three are indicated, leave blanks]

- (a) Most important:            [ ]    *[Indicate letter]*
- (b) Second most important:    [ ]    *[Indicate letter]*
- (c) Third most important:      [ ]    *[Indicate letter]*

**END OF QUESTIONNAIRE.**

**Thank the respondent and ask whether they have any further questions or comments.**

**IMAGINE (Informal Mhealth in Africa: Grassroots Initiatives & Networks)**

**FOCUS GROUP GUIDE FOR COMMUNITY HEALTH WORKERS**

Date: DD / MM / YY Facilitator's name \_\_\_\_\_

Time started \_\_\_\_\_ Note-taker's name \_\_\_\_\_

Time finished \_\_\_\_\_ Settlement identifier \_\_\_\_\_

Country: [Ghana / Ethiopia / Malawi] Health centre catchment area \_\_\_\_\_

Audio file number & device [where consent is given for recording] \_\_\_\_\_

**1) Introductions [see separate documents]**

- Explain the purpose of the research and this FDG.
- Check informed consent and explain importance of confidentiality.
- Ask each participant to introduce themselves and complete table below
- Request permission to audio record the FDG.

| Participant | Job/role<br>(e.g. HSA) | Gender | Age | Educational /<br>training<br>qualification | Length of<br>service as<br>CHW | Mobile<br>phone<br>ownership |
|-------------|------------------------|--------|-----|--------------------------------------------|--------------------------------|------------------------------|
| 1           |                        |        |     |                                            |                                |                              |
| 2           |                        |        |     |                                            |                                |                              |
| 3           |                        |        |     |                                            |                                |                              |
| 4           |                        |        |     |                                            |                                |                              |
| 5           |                        |        |     |                                            |                                |                              |
| 6           |                        |        |     |                                            |                                |                              |
| 7           |                        |        |     |                                            |                                |                              |

**2) Explore the work being done by community health workers:**

- What are your main tasks and responsibilities?
- What training and support have you received / do you receive?
- What challenges do you experience in your work?
- What factors facilitate your work?

**3) Work phones and 'formal mhealth'**

- Does anyone have access to official work-based phones (mobiles, landlines, 2-way radios)?
- Has anyone been involved in any official mhealth initiatives?
- Details and experiences of either/both?

**4) Personal mobile phones and CHW work: what, how, why?**

- Find out who has a mobile phone and who has internet-enabled phones.
- Do you use your personal mobile phones for work?
  - How often do you use them?
  - How / for what purposes? [Prompts: contacting colleagues (when & why?), contacting clients/patients (when & why?), reporting, weekly, monthly, and

quarterly performances, getting feedbacks from immediate boss, supervisors.....,  
Managing logistics, getting information, getting help in emergencies, etc.

- *Encourage participants to share their personal experiences (good and bad) and stories without compromising client/patient confidentiality. How frequent?*

## 5) Phonelessness

- Do any participants *not* have [or not have access to] a personal mobile phone?
- Are you aware of any CHWs who do not have personal mobile phones?
- Why do some CHWs not have personal mobile phones? Cost? Interest?
  - What are their experiences? What (if any) challenges have they faced?
- To what extent is it *expected* that CHWs will have and use personal phones in their work?
- Are there any opportunities not available to CHWs without personal mobile phones?
- Do CHWs without phones come under pressure to get one? [From whom, why, etc.?]

## 6) Evaluations of experiences

- What have been the benefits/advantages of using personal mobile phones in your work?
  - Prompts: keeping in touch better with clients, patients, colleagues, supervisors, etc.; able to manage work logistics better; use in emergencies, etc.
- What (if any) have been the difficulties of using personal mobile phones in your work?
  - Prompts: air time, phone charge, phone signal, phone repair, network coverage, etc.
- What (if any) have been the disadvantages of using personal mobile phones in your work?
  - Prompts: cost, increased workload, decreased face-to-face contact with clients, etc.
- How do you weigh up and evaluate these benefits, drawbacks and challenges?

## 7) Ways forward

- Have there been any initiatives to address the difficulties/challenges identified above?
  - Either using phones or not having access to phones, etc.
- What are the most important steps that could be taken to address any problems identified?
  - By government, by managers/bosses, by CHWs, by clients/patients?
  - How should these be prioritised?

## 8) Conclusion

- Ask whether participants have anything else they would like to contribute.
- Thank participants and remind them of responsibilities vis-à-vis confidentiality.

**Notes and reflections:** *How did the FGD go? Interruptions? Participants engaged? Any problems? Any areas they were especially keen to or unwilling to talk about?*

**IMAGINE (Informal Mhealth in Africa: Grassroots Initiatives & Networks)**

**FOCUS GROUP GUIDE FOR CLIENTS**

Date: DD / MM / YY Facilitator's name \_\_\_\_\_

Time started \_\_\_\_\_ Note-taker's name \_\_\_\_\_

Time finished \_\_\_\_\_ Settlement identifier \_\_\_\_\_

Country: [Ghana / Ethiopia / Malawi] Health centre catchment area \_\_\_\_\_

Audio file number & device [where consent is given for recording] \_\_\_\_\_

**1) Introductions [see separate documents]**

- Explain the purpose of the research and this FDG.
- Check informed consent and explain importance of confidentiality.
- Ask each participant to introduce themselves and complete table below
- Request permission to audio record the FDG.

| Participant | Gender | Age | Occupation | Mobile phone ownership? |
|-------------|--------|-----|------------|-------------------------|
| 1           |        |     |            |                         |
| 2           |        |     |            |                         |
| 3           |        |     |            |                         |
| 4           |        |     |            |                         |
| 5           |        |     |            |                         |
| 6           |        |     |            |                         |
| 7           |        |     |            |                         |

**2) Personal mobile phones and healthcare: what, how, why?**

- Which participants own and/or have access to a mobile phone? And internet phones?
- Are participants using personal mobiles phones for healthcare-related purposes?
- **How** and **why** are people using mobile phones in in relation to healthcare?
  - Prompts: 'formal' mhealth initiatives, contacting health-workers, reporting performances, receiving feedback, getting information/advice, getting help in emergencies, etc.
- *Encourage participants to share their personal experiences of using mobiles for health care.*

**3) Evaluations of experiences**

- What have been the benefits/advantages of using personal mobile phones for healthcare?
  - Prompts: able to keep in touch better with heath-workers, able to access information, useful in emergencies, etc.
- What (if any) have been the difficulties of using personal mobile phones for healthcare?
  - Prompts: maintaining air time, phone charge, phone signal, phone repair, network coverage, etc.
- What (if any) have been the disadvantages of using personal mobile phones for healthcare?



- Prompts: cost, decreased face-to-face contact with health-workers, wrong advice etc.

- Overall, what have been the impacts of using mobile phones on healthcare and wellbeing?
  - Do these vary for different kinds of clients/patients, (e.g. by age, gender, SES, etc.)
- How do you weigh up and evaluate these benefits, drawbacks and challenges?

#### 4) Phonelessness

- Do any participants *not* have [or not have access to] a personal mobile phone?
- Do you know other people in the community without [access to] a mobile phone?
  - What are their experiences?
  - What challenges have they faced in accessing healthcare without a phone?
- To what extent is it *expected* that clients/patients will have and use phones in healthcare?
  - Explain?

#### 5) Ways forward

- Are you aware of any initiatives that have tried to address any of these challenges?
  - Details: which organisation(s)? Where? When? Perceived impact?
- What are the most important steps that could be taken to address any problems identified?
  - By patients/clients?
  - By other (e.g. By government, health-workers, etc.)?
  - How should these be prioritised?

#### 6) Conclusion

- Ask whether participants have anything else they would like to contribute.
- Thank participants and remind them of responsibilities vis-à-vis confidentiality.

**Notes and reflections:** *How did the FGD go? Interruptions? Participants engaged? Any problems? Any areas they were especially keen to or unwilling to talk about?*
